# Supplementary material for: Temporal trends in the incidence of infective endocarditis in patients with a prosthetic heart valve
Source: HighWire-hosted journal article supplement (doi:10.1136/openhrt-2023-002269), 2023-04-01
Supplement: openhrt-2023-002269supp001_data_supplement.pdf [file openhrt-2023-002269supp001_data_supplement.pdf]

## Supplementary Material

**Supplemental table 1: ICD and Procedure-codes**

| <b>Category</b>         | <b>Type</b> | <b>Codes</b>                                                                                 |
|-------------------------|-------------|----------------------------------------------------------------------------------------------|
| <b>Study population</b> |             |                                                                                              |
| <u>Aortic valve</u>     | NOMESCO     |                                                                                              |
| Prosthesis              |             | KFMD                                                                                         |
| Mechanical              |             | KFMD00                                                                                       |
| Biological              |             | KFMD10, KFMD11, KFMD12, KFMD14,<br>KFMD20, KFMD30, KFMD33, KFMD40,<br>KFMD96, KFCA60, KFCA70 |
| <u>Mitral valve</u>     | NOMESCO     |                                                                                              |
| Prosthesis              |             | KFKD                                                                                         |
| Mechanical              |             | KFKD00                                                                                       |
| Biological              |             | KFKD10, KFKD11, KFKD14,<br>KFKD20, KFKD96                                                    |
| <u>Pulmonary valve</u>  | NOMESCO     |                                                                                              |
| Prosthesis              |             | KFJF                                                                                         |
| Mechanical              |             | KFJF00                                                                                       |
| Biological              |             | KFJF10, KFJF30                                                                               |

|                        |         |        |
|------------------------|---------|--------|
| <u>Tricuspid valve</u> | NOMESCO |        |
| Prosthesis             |         | KFGE   |
| Mechanical             |         | KFGE00 |
| Biological             |         | KFGE10 |

**Outcome**

|              |        |                       |
|--------------|--------|-----------------------|
| IE-diagnosis | ICD-10 | I33.x, I38.x or I39.8 |
|              | ICD-8  | 421                   |

---

IE: Infective endocarditis. ICD: International Classification of Diseases. NOMESCO: Danish procedure codes for medical examination organized by The Nordic Medico-Statistical Committee.

---

*Supplementary Table 1. The table shows specific codes used to derive type of valve surgery and the study population.*

**Supplemental table 2: ICD- and Procedure-, and ATC-codes**

| Category                                             | Type                                            | Codes                                                                                                                                                                                    |
|------------------------------------------------------|-------------------------------------------------|------------------------------------------------------------------------------------------------------------------------------------------------------------------------------------------|
| <b>Comorbidities</b>                                 |                                                 |                                                                                                                                                                                          |
| Cardiac implantable electronic devices               | Danish procedure codes for medical examinations | BFCA0, BFCB0                                                                                                                                                                             |
| Extraction of cardiac implantable electronic devices | Danish procedure codes for medical examinations | BFCA4, BFCB4, BFCB8                                                                                                                                                                      |
| Diabetes                                             | ICD-10                                          | E10.x to E14.x                                                                                                                                                                           |
|                                                      | ICD-8                                           | 250                                                                                                                                                                                      |
| Dialysis (chronic)                                   | Danish procedure codes for medical examinations | BJFD2                                                                                                                                                                                    |
| Renal disease                                        | ICD-10                                          | E10.2, E11.2, E13.2, E14.2<br>I12.0 I13.x<br>N02.x to N08.x, N11.x, N12.x, N14.x, N15.8, N15.9, N16.0, N16.2 to N16.4, N16.8, N18.x, N19.x, N26.x<br>Q61.2, Q61.3, Q61.5, Q61.9<br>Z99.2 |
|                                                      | ICD-8                                           | 25002<br>403, 404, 40039<br>581, 582, 583, 584, 59009, 59320<br>75310, 75311, 75319                                                                                                      |
| Liver disease                                        | ICD-10                                          | B15.x to B19.x, C22.x, D68.4C I98.2, K70.x to K77.0, Q61.8A, Z94.4                                                                                                                       |
|                                                      | ICD-8                                           | 070, 155, 571 to 573                                                                                                                                                                     |
| Atrial fibrillation/flutter                          | ICD-10                                          | I48                                                                                                                                                                                      |
|                                                      | ICD-8                                           | 42793, 42794                                                                                                                                                                             |
| Congestive heart failure                             | ICD-10                                          | I11.0, I13.0, I13.2, I42.x, I50.x<br>J81.9                                                                                                                                               |
|                                                      | ICD-8                                           | 425, 428                                                                                                                                                                                 |
| Myocardial infarction                                | ICD-10                                          | I21.x, I22.x                                                                                                                                                                             |
|                                                      | ICD-8                                           | 410 to 414                                                                                                                                                                               |

|                                  |                 |                                                                                                                                                              |
|----------------------------------|-----------------|--------------------------------------------------------------------------------------------------------------------------------------------------------------|
| Disease of the mitral valve      | ICD-10<br>ICD-8 | I34<br>394, 396                                                                                                                                              |
| Disease of the aortic valve      | ICD-10<br>ICD-8 | I35<br>395, 396                                                                                                                                              |
| Ischemic/haemorrhagic stroke     | ICD-10<br>ICD-8 | I60.x to I64.x<br>430 to 436                                                                                                                                 |
| Chronic obstructive lung disease | ICD-10<br>ICD-8 | J42, J43, J44<br>490, 491, 492                                                                                                                               |
| Malignancy                       | ICD-10<br>ICD-8 | C00 to C97<br>140 to 209                                                                                                                                     |
| <b>Medicine</b>                  |                 |                                                                                                                                                              |
| Antihypertensive medication      | ATC             | C02A, C02B, C02C, C02DA, C02DB, C02DD, C02DG, C02L, C03A-B, C03D-E, C03X, C07A-D, C07F, C08 C08G, C09AA, C09BA, C09BB, C09CA, C09DA, C09DB, C09XA02, C09XA52 |
| Lipid Lowering medication        | ATC             | C10                                                                                                                                                          |
| Oral anticoagulants              | ATC             |                                                                                                                                                              |
| <i>Vitamin-K antagonists</i>     |                 | B01AA                                                                                                                                                        |
| <i>NOAC<sup>1</sup></i>          |                 | B01AF01, B01AF02, B01AF03, B01AE07                                                                                                                           |
| Glucose Lowering medication      | ATC             | A10A, A10B                                                                                                                                                   |

“x” indicates every sub-classification ATC code

<sup>1</sup> Novel Oral Anticoagulant

ATC: Anatomical Therapeutic Chemical Classification System.

ICD: International Classification of Diseases. NOMESCO: Danish procedure codes for medical examination organized by The Nordic Medico-Statistical Committee.

*Supplementary Table 2. The table shows specific codes used to derive comorbidities and concomitant pharmacotherapy.*

### Supplemental Figures and Legends

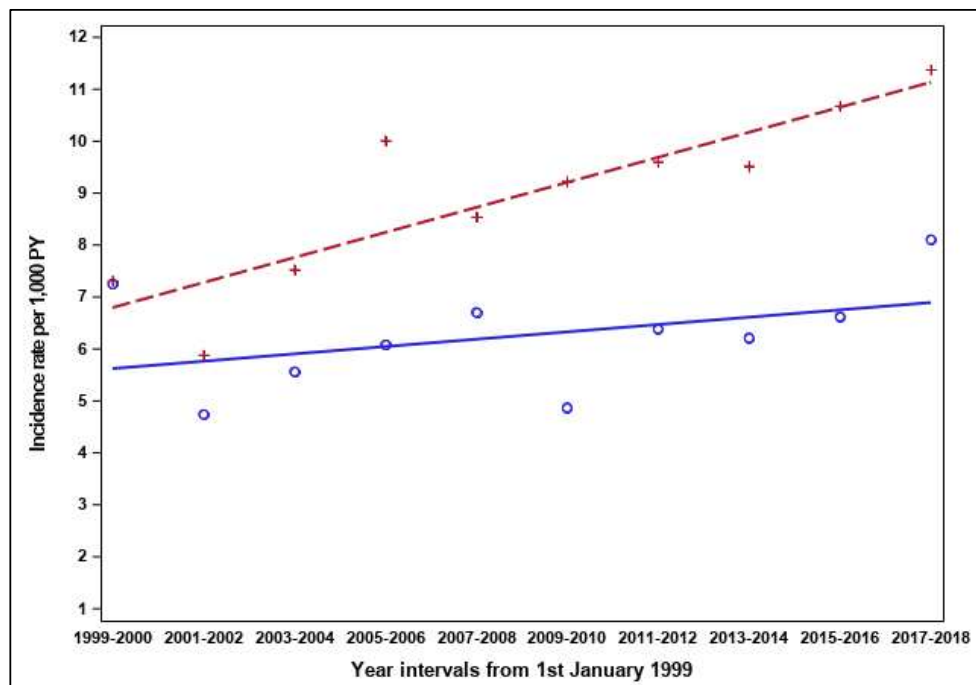

*Supplemental figure 1: Crude incidence rates per 1,000 person years (PY) of IE per two-year intervals. Analyses were stratified by sex (women (blue) and men (red)). A linear regression model was plotted to examine crude difference per calendar year.*

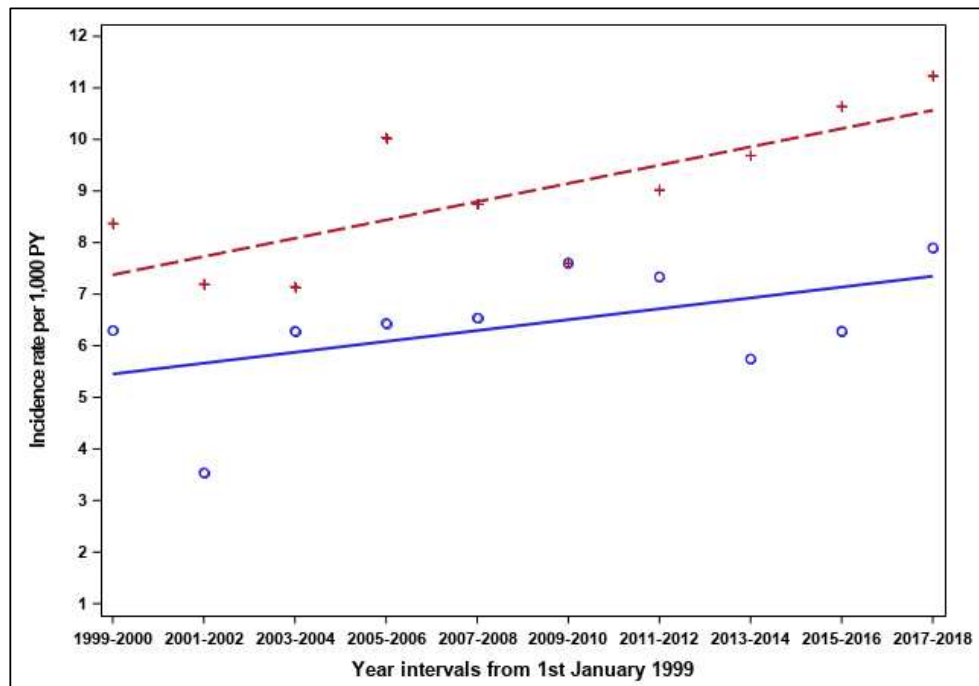

Supplemental figure 2: Crude incidence rates per 1,000 person years (PY) of IE per two-year intervals. Analyses were stratified by age groups (<70 (blue) and ≥70 (red) years). A linear regression model was plotted to examine crude difference per calendar year.
