# Supplementary material for: Temporal trends in the incidence of infective endocarditis in patients with a prosthetic heart valve
Source: HighWire-hosted journal article supplement (doi:10.1136/openhrt-2023-002269), 2023-04-01

## INFECTIVE ENDOCARDITIS: is the incidence rate increasing in patients with prosthetic heart valves?

### DESIGN

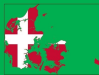

Retrospective nationwide-study in DK:1999-2018

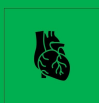

Using validated Danish health-care registries 30,518 persons were identified, who underwent heart valve implantation

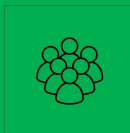

The total population =26,604

### RESULTS

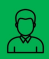

- 1,442 (5.4%) cases of first time IE

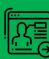

- median age: 71.7 years at the time of implantation (63.1% men)

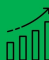

- median follow-up:5.4 years.

- The adjusted incidence rate ratio was 1.04 [95% CI: 1.02; 1.06] per two-year interval ( $p = 0.0007$ ).

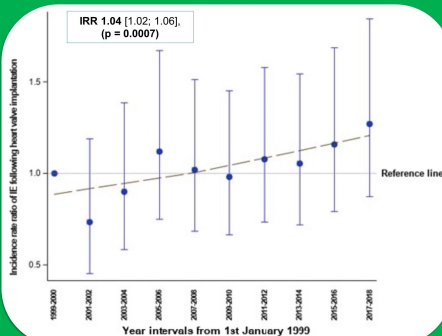

### CONCLUSION

**YES!**

1. The incidence rate of IE following prosthetic heart valve implantation has increased over the last 20 years in Denmark.
2. The increase is irrespective of age and gender.

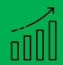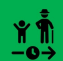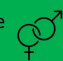

Supplement: openhrt-2023-002269supp002_data_supplement.pdf [file openhrt-2023-002269supp002_data_supplement.pdf]
